# Supplementary material for: Features of Nuclear Export Signals of NS2 Protein of Influenza D Virus
Source: MDPI journal article supplement (doi:10.3390/v12101100), 2020-09-29
Supplement: s1 [file s1]

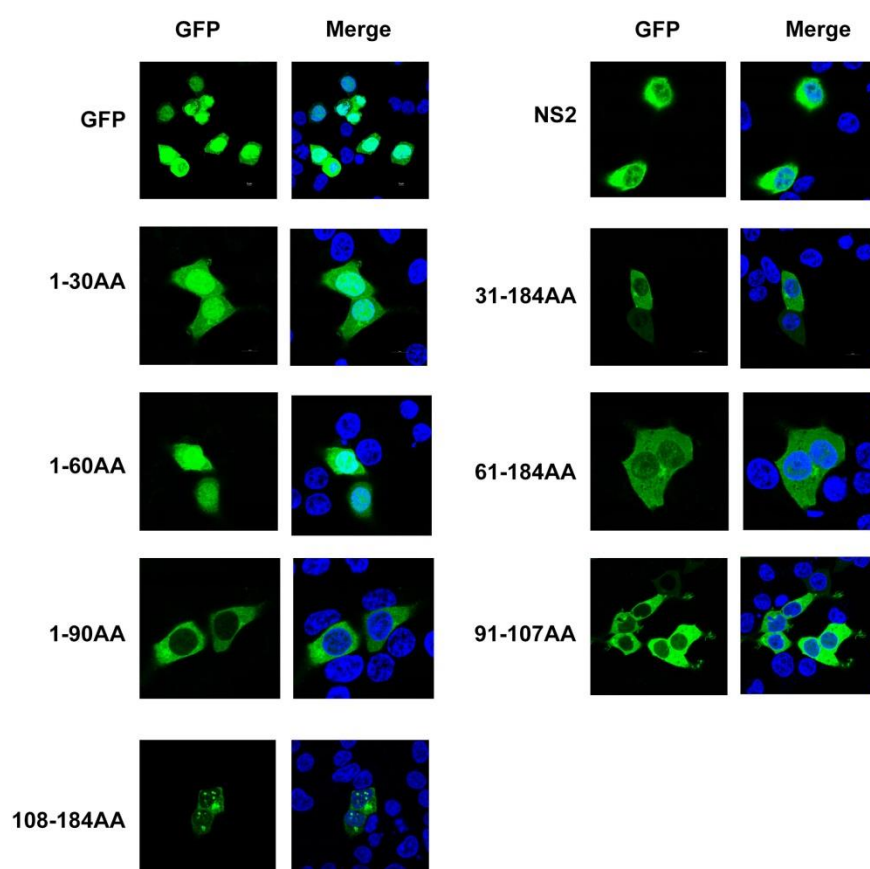

**Figure S1.** HEK293T cells were transfected with truncated constructs (1–30aa, 31–184aa, 1–60aa, 61–184aa, 1–90aa, 91–107aa, and 108–184aa) corresponding to Figure 3. Cells were then fixed, permeabilized, and stained with the 4, 6-diamidino-2-phenylindole (DAPI) and subcellular localization of eGFP fusion protein were examined via fluorescence microscopy 24 h post-transfection.

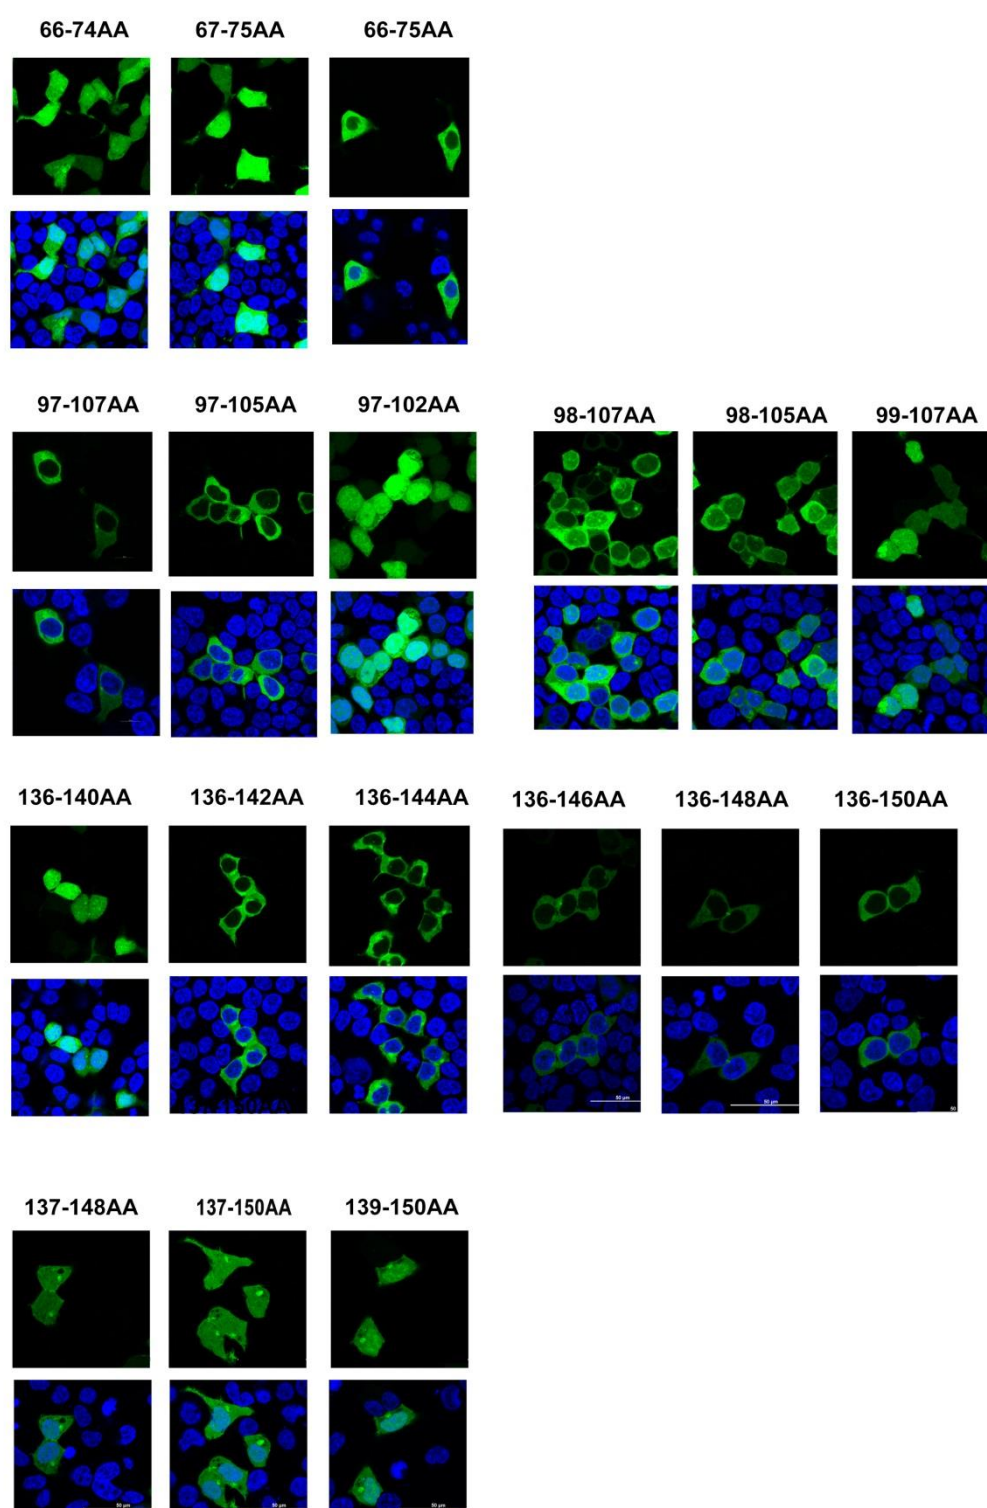

**Figure S2.** pCAGGS-eGFP-NES were transfected into HEK293T cells corresponding to Figure 4. Cells were then fixed, permeabilized, and stained with the 4, 6-diamidino-2-phenylindole (DAPI) and subcellular localization of eGFP fusion protein were examined via fluorescence microscopy 24 h post-transfection.

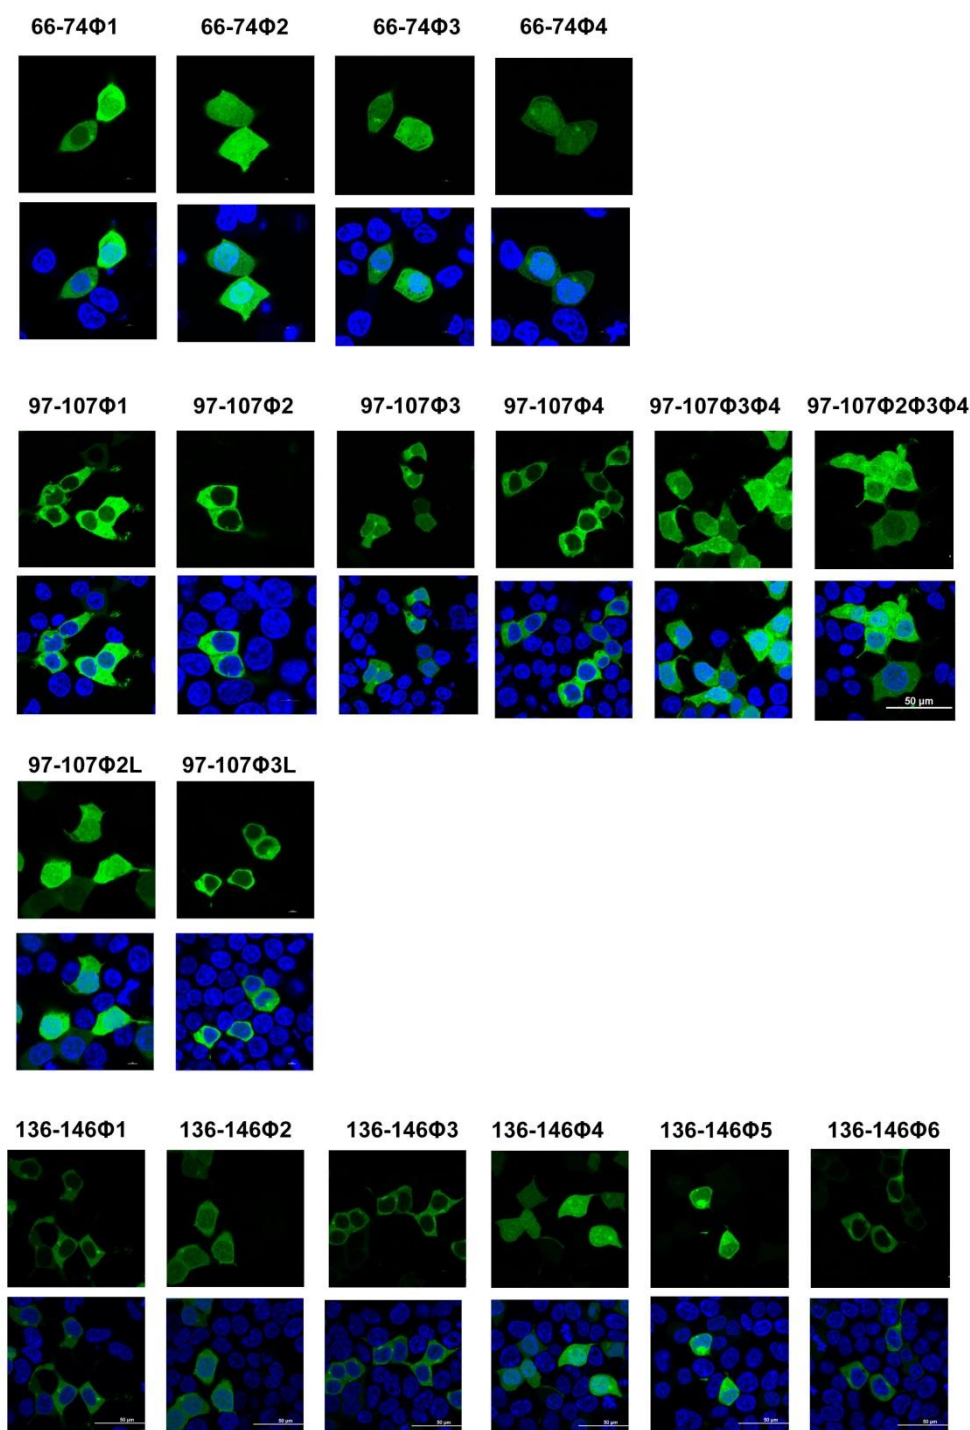

**Figure S3.** a series of mutant constructions were transfected into HEK293T cells corresponding to Figure 5. Cells were then fixed, permeabilized, and stained with the 4, 6-diamidino-2-phenylindole (DAPI) and subcellular localization of eGFP fusion protein were examined via fluorescence microscopy 24 h post-transfection.

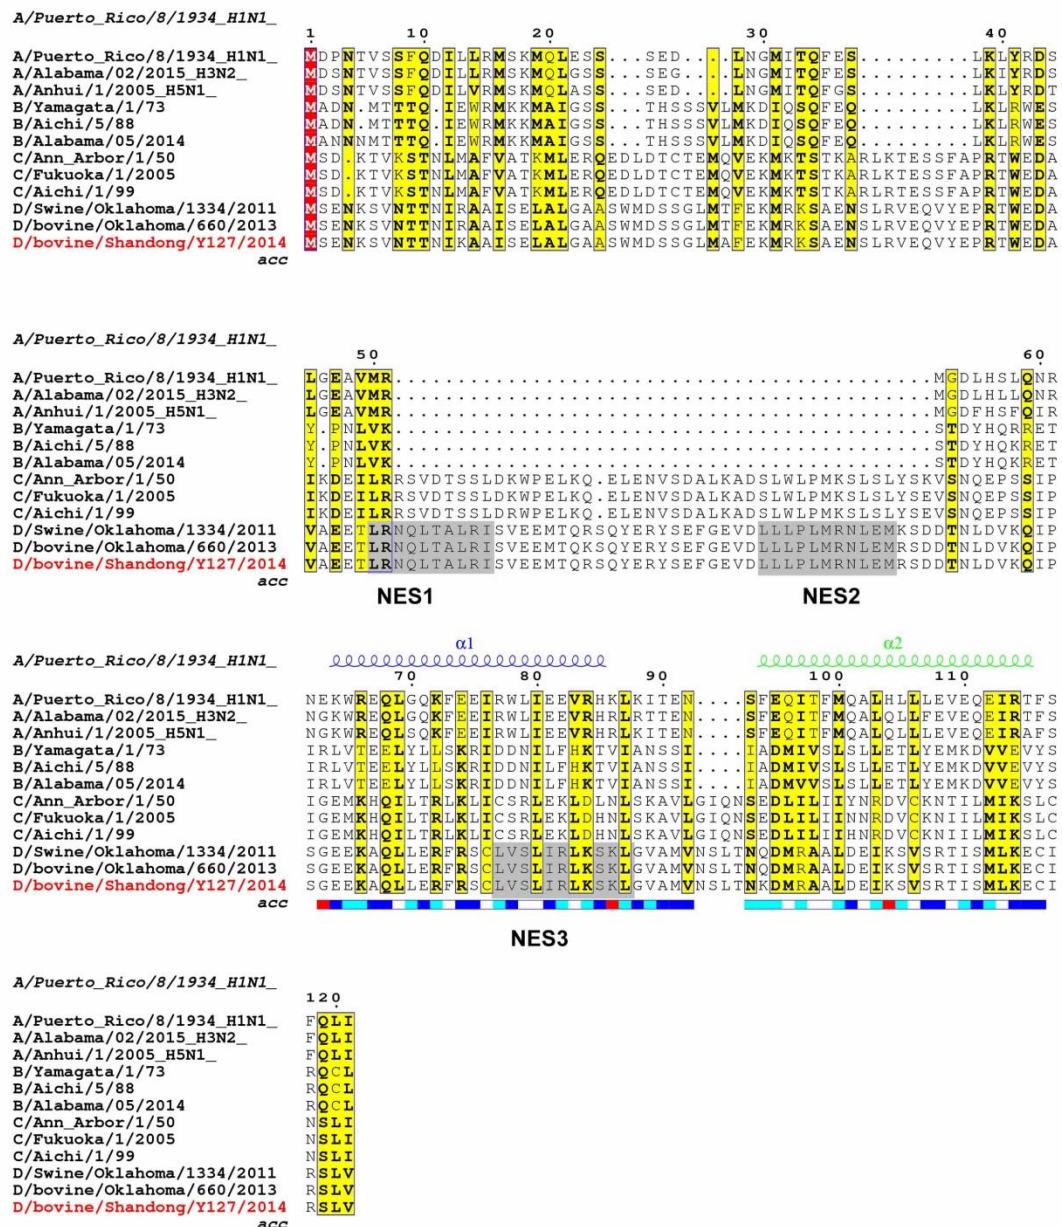

**Figure S4.** Sequence alignment of NS2 proteins of type A, B, C and D influenza viruses. All sequences were aligned with ClustalW, and the secondary structure elements are defined based on PDB file 1PD3(A/Puerto Rico/8/1934, H1N1) using online program, ESPrpt server [30]. All the sequences were obtained from the NIAID Influenza Research Database (IRD) online through the web site at <http://www.fludb.org>.



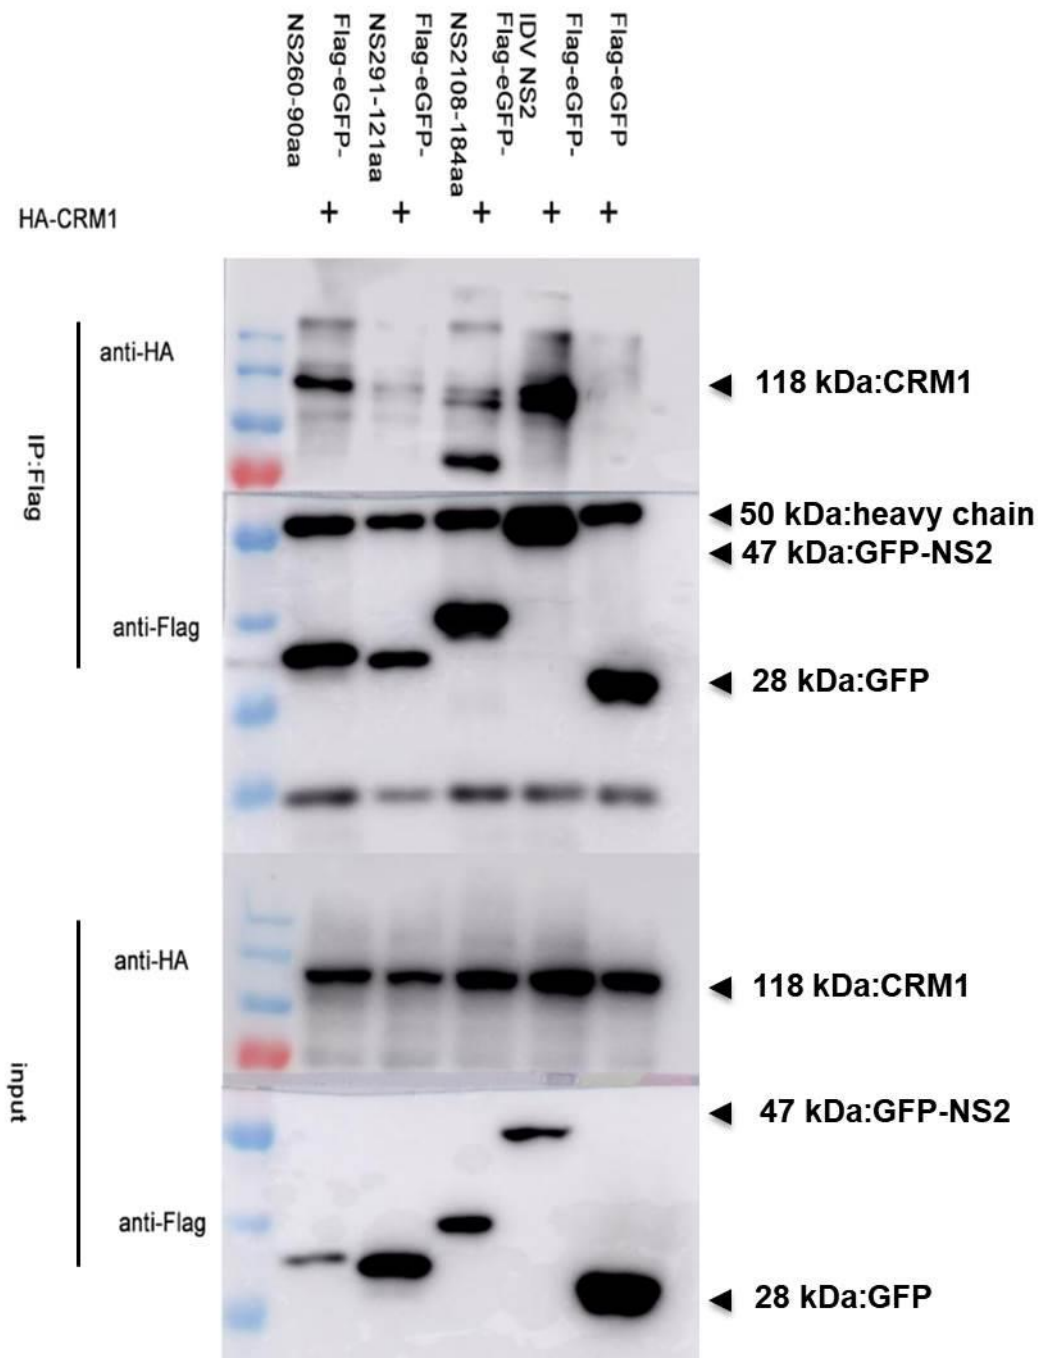

Figure S5. Original image of Figure 5 D.

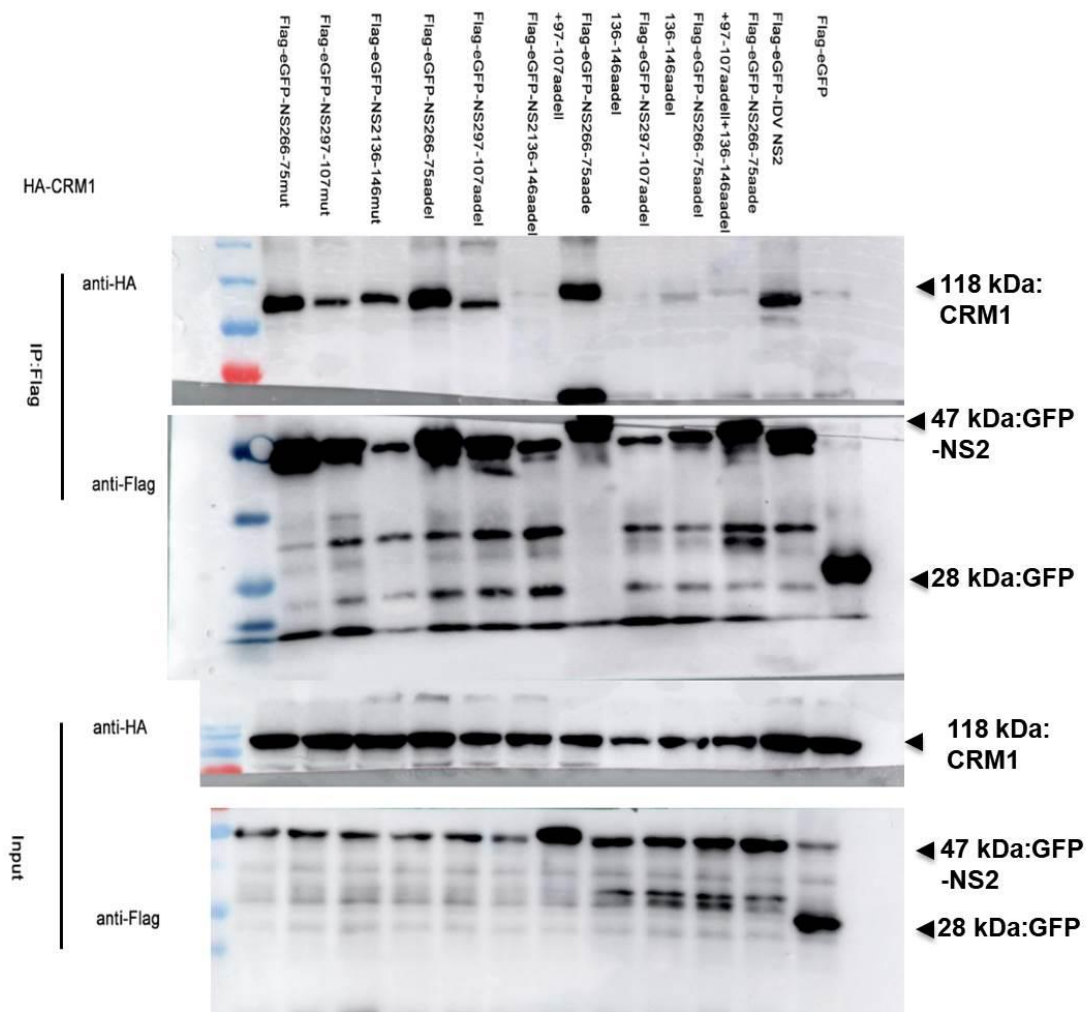

Figure S6. Original image of Figure 6 B.
